# Supplementary material for: Influence of mid-latitude sea surface temperature fronts on the atmospheric water cycle and storm track activity
Source: Copernicus journal article supplement (doi:10.5194/wcd-5-1031-2024), 2024-08-15
Supplement: Supplementary file 1 [file wcd-5-1031-2024-supplement.pdf]

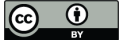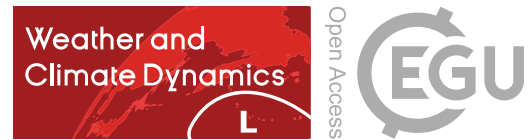

*Supplement of*

## **Influence of mid-latitude sea surface temperature fronts on the atmospheric water cycle and storm track activity**

**Fumiaki Ogawa and Thomas Spengler**

*Correspondence to:* Fumiaki Ogawa (fumiaki.ogawa@atmos.rcast.u-tokyo.ac.jp)

The copyright of individual parts of the supplement might differ from the article licence.

## 1 Introduction

This supplementary material consists of 6 figures that support our arguments in the main text but are not necessarily required to be shown in the main text.

## 2 Supplementary figures

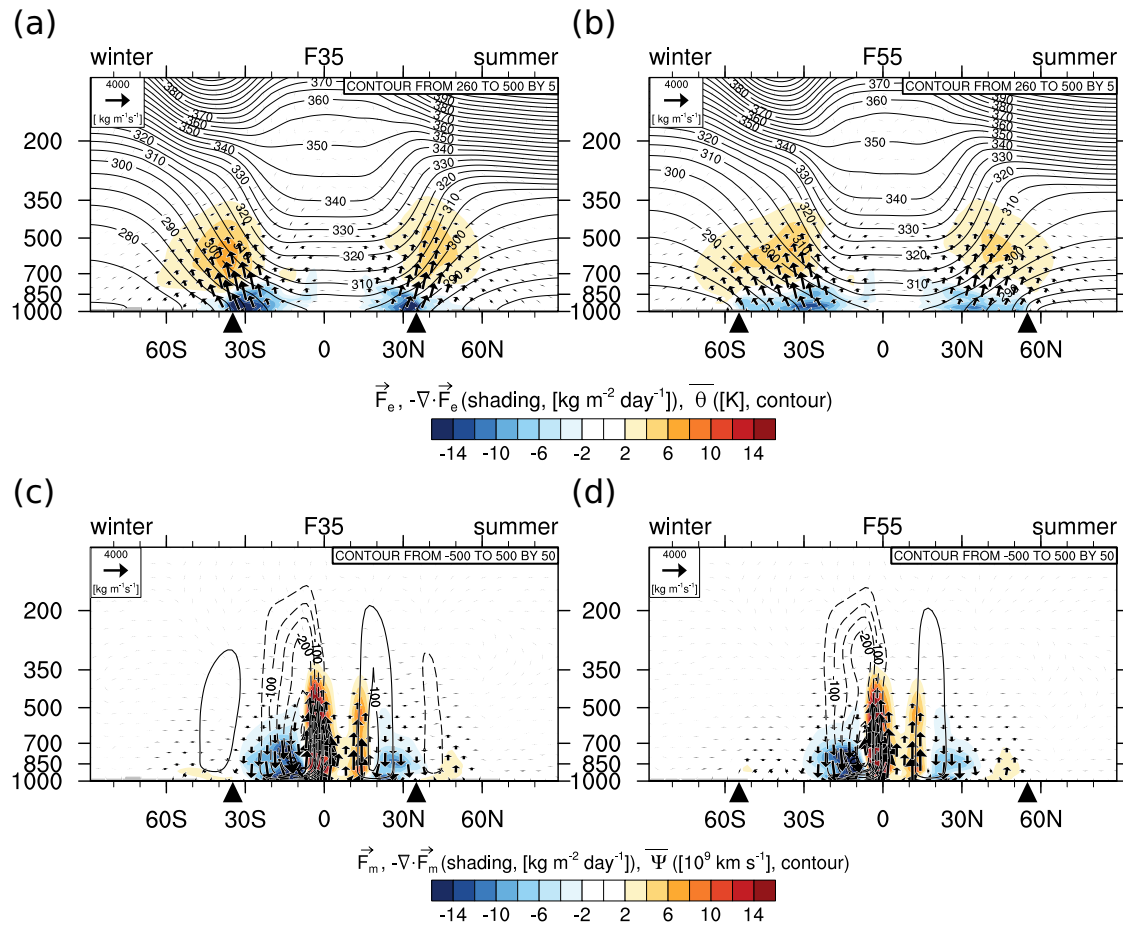

Figure S1. as fig. 3, but for F35, F55.

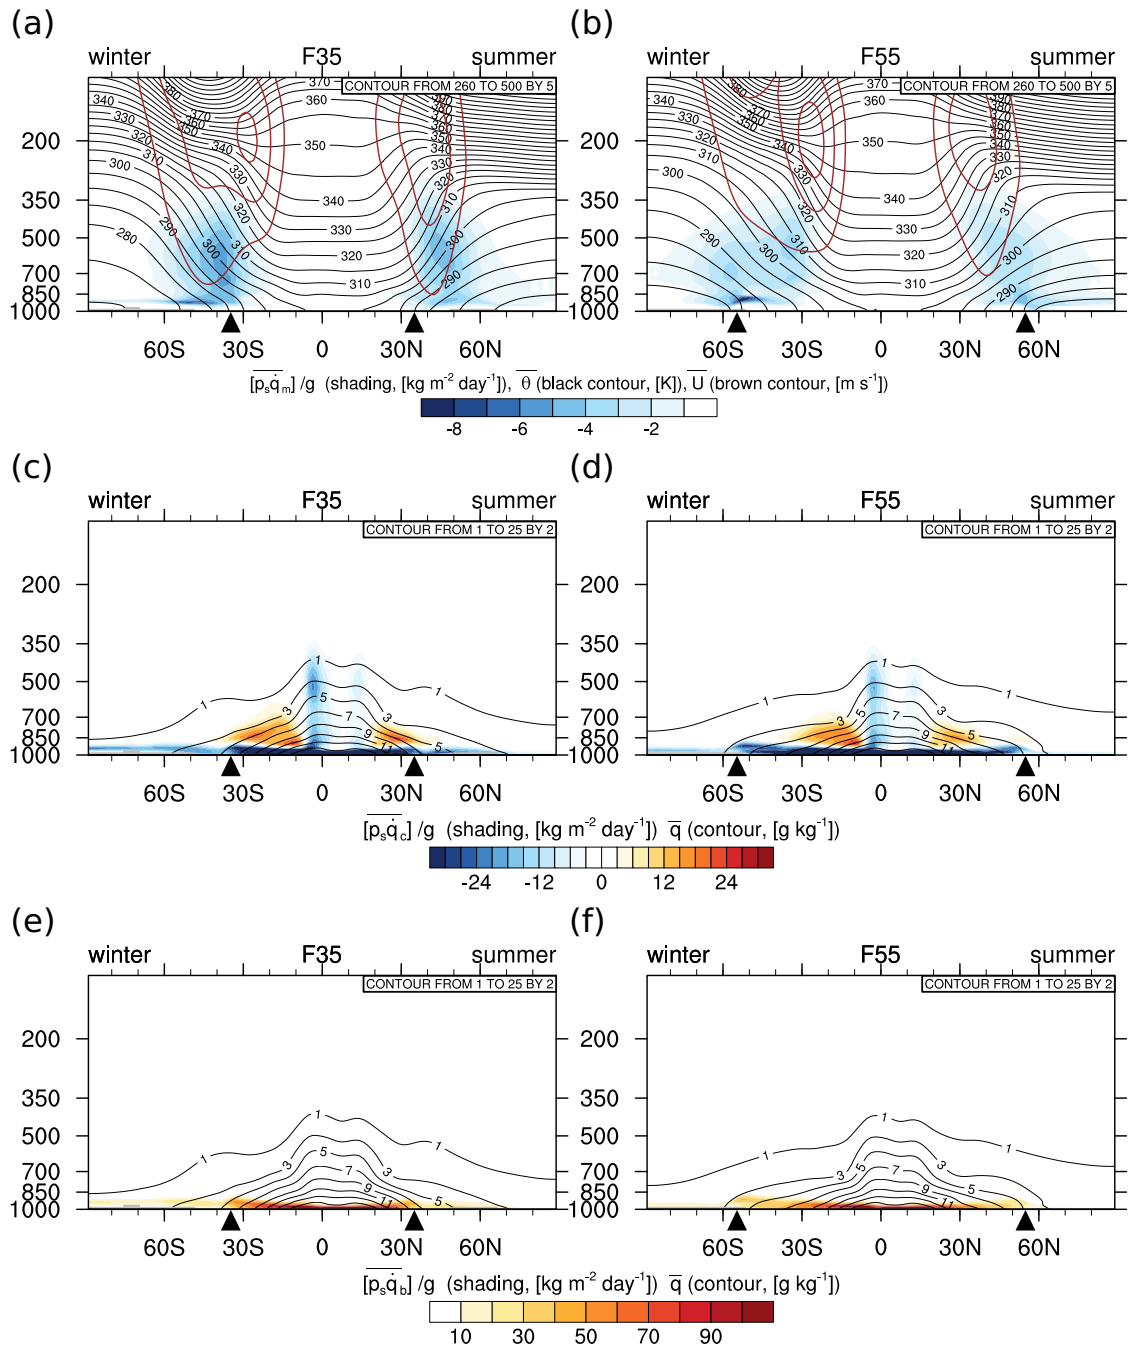

Figure S2. as fig. 4, but for F35, F55.

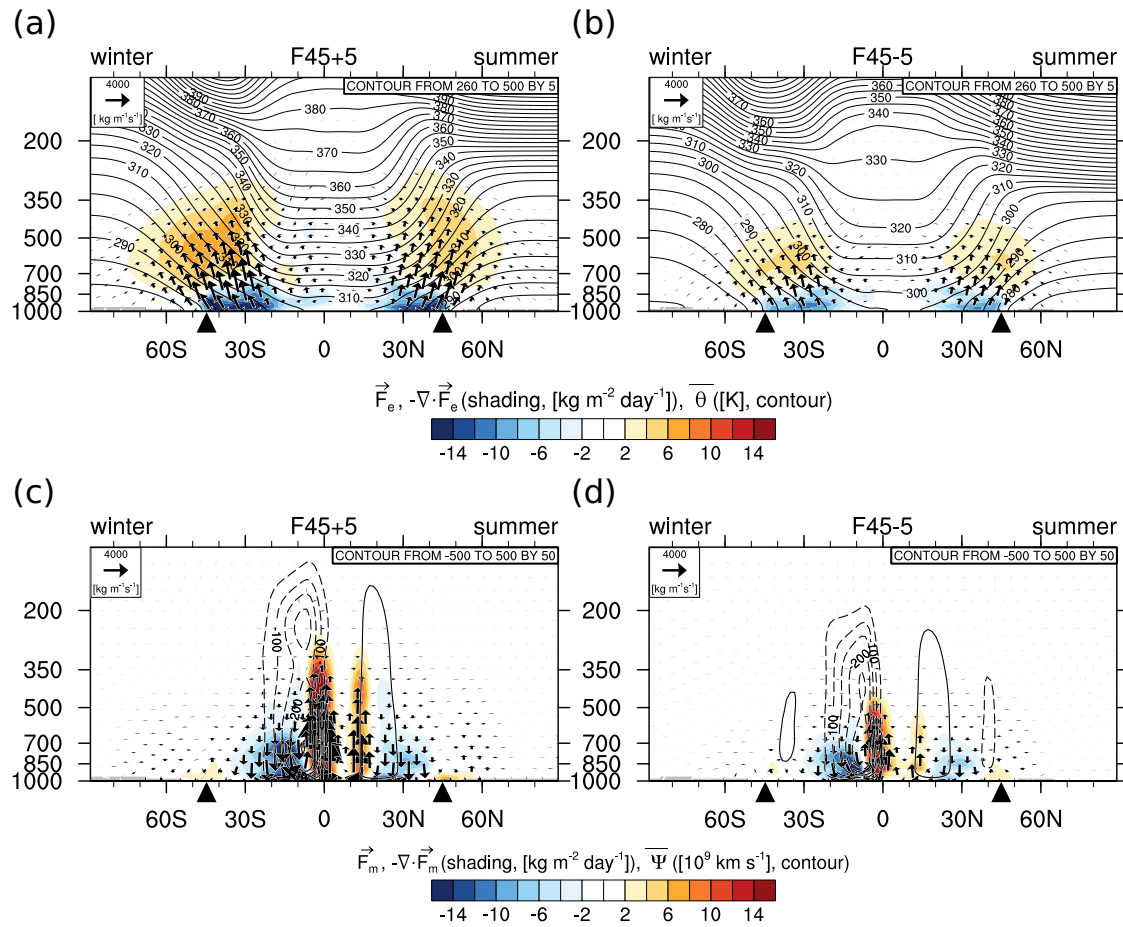

Figure S3. as fig. 3, but for F45+5, F45-5.

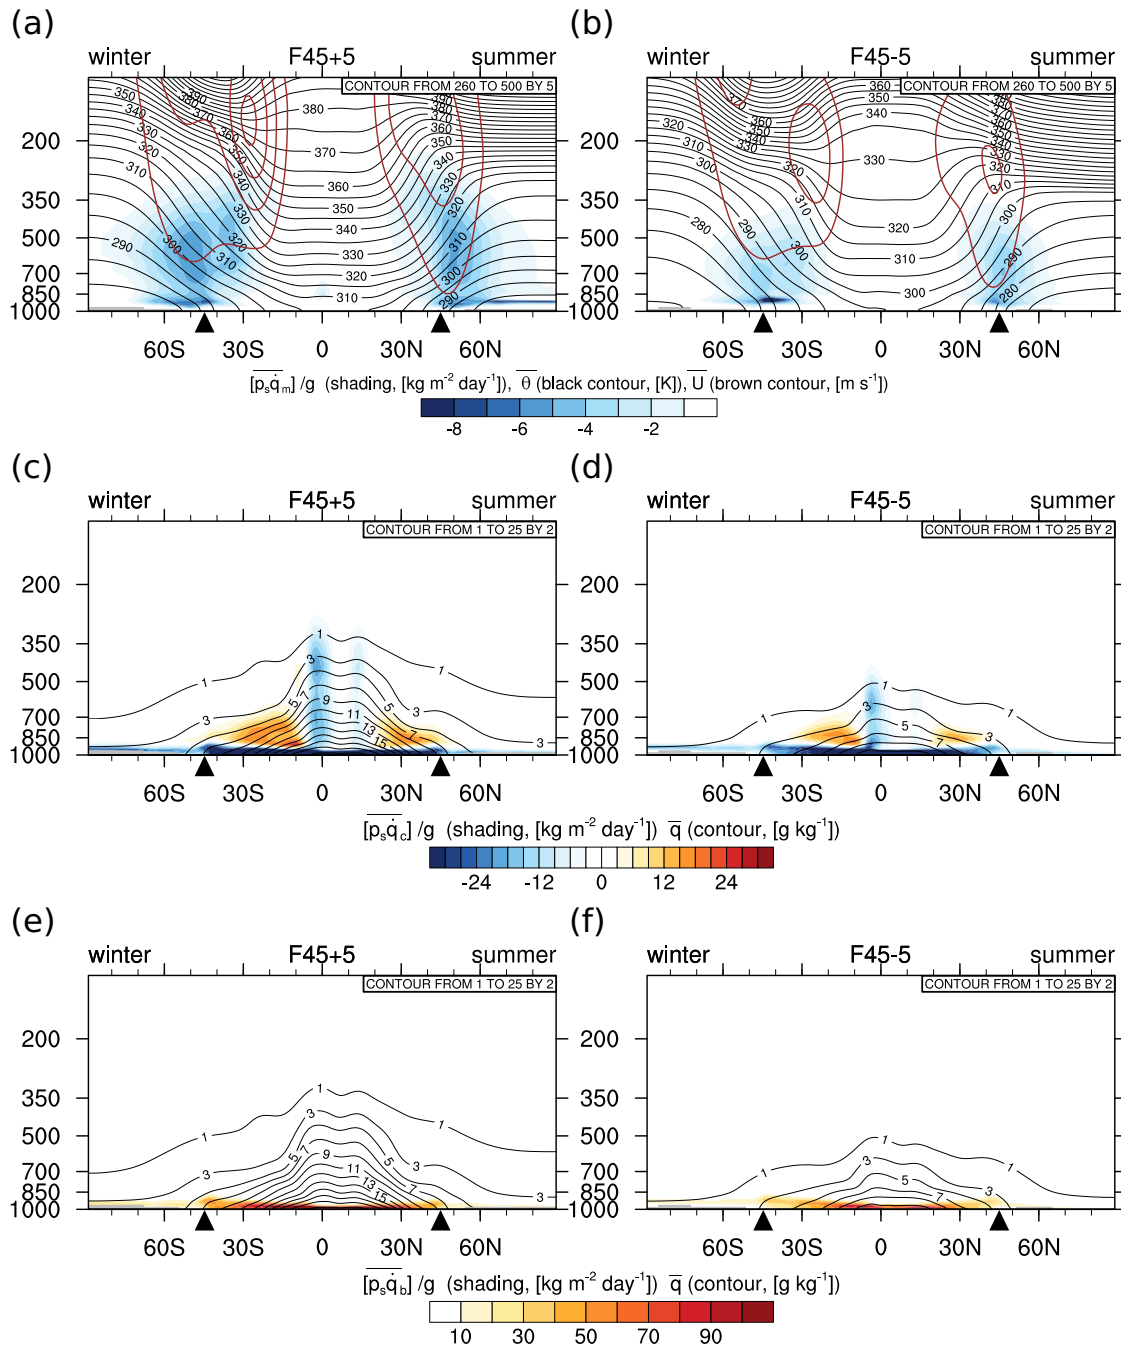

Figure S4. as fig. 4, but for 45+5, F45-5.

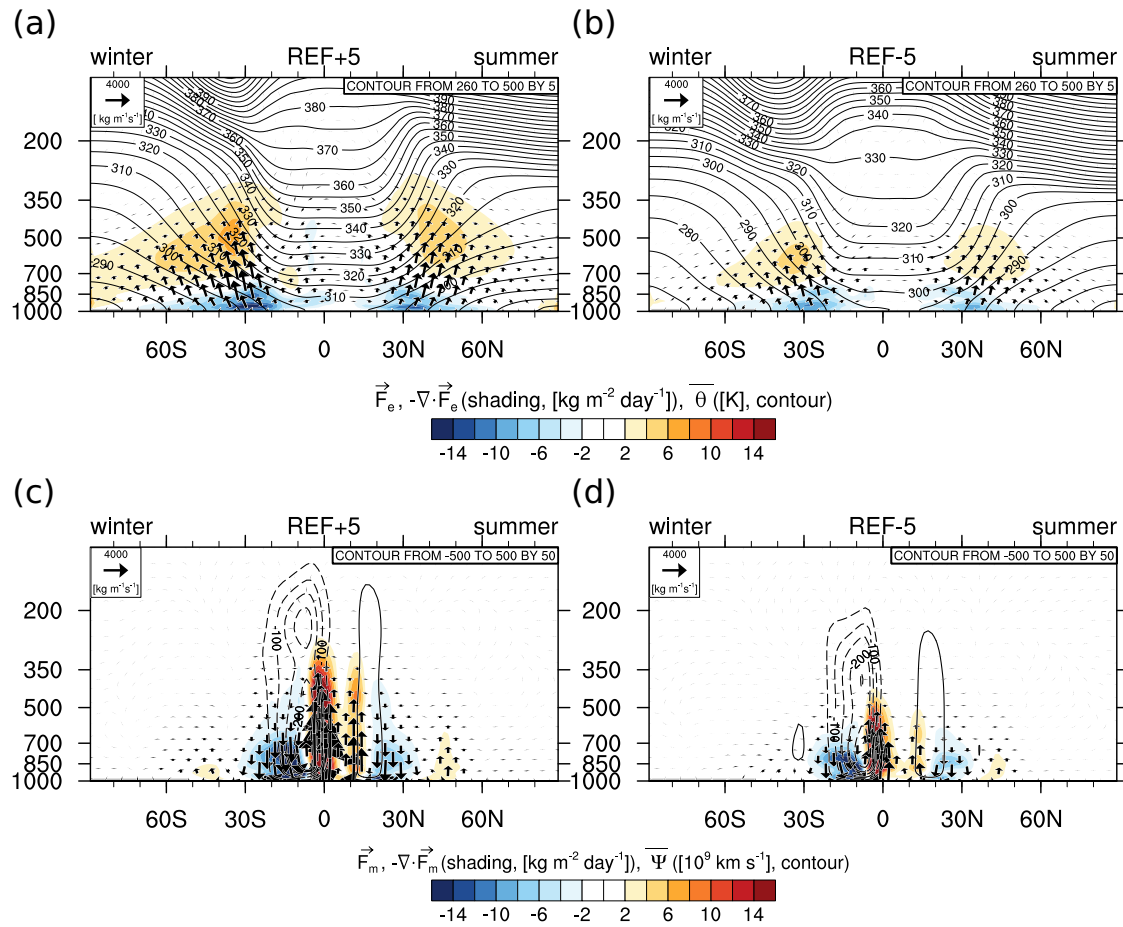

Figure S5. as fig. 3, but for REF+5, REF-5.

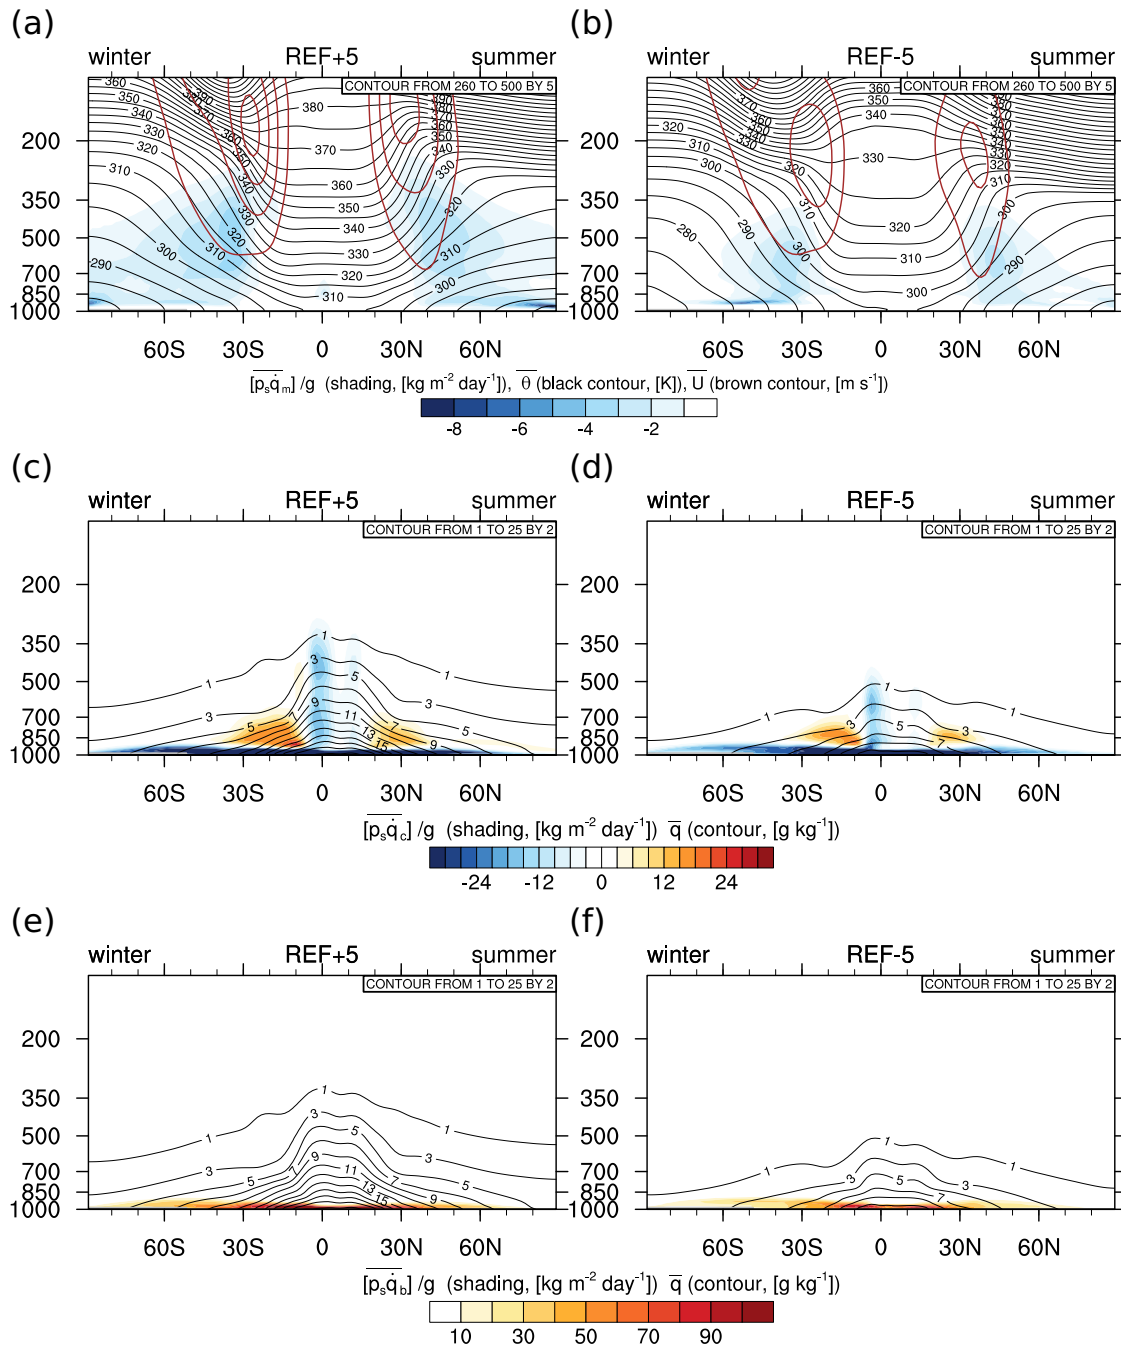

Figure S6. as fig. 4, but for REF+5, REF-5.
